# Supplementary material for: Retinal Ganglion Cell Layer Thinning Within One Month of Presentation for Non-Arteritic Anterior Ischemic Optic Neuropathy
Source: PubMed Central journal article supplement — Invest Ophthalmol Vis Sci. 2016 Jul;57(8):3588–93. doi: 10.1167/iovs.15-18736 (PMC5996873; doi:10.1167/iovs.15-18736), 2016-07
Supplement: i1552-5783-57-8-3588-s01.pdf [file i1552-5783-57-8-3588-s01.pdf]

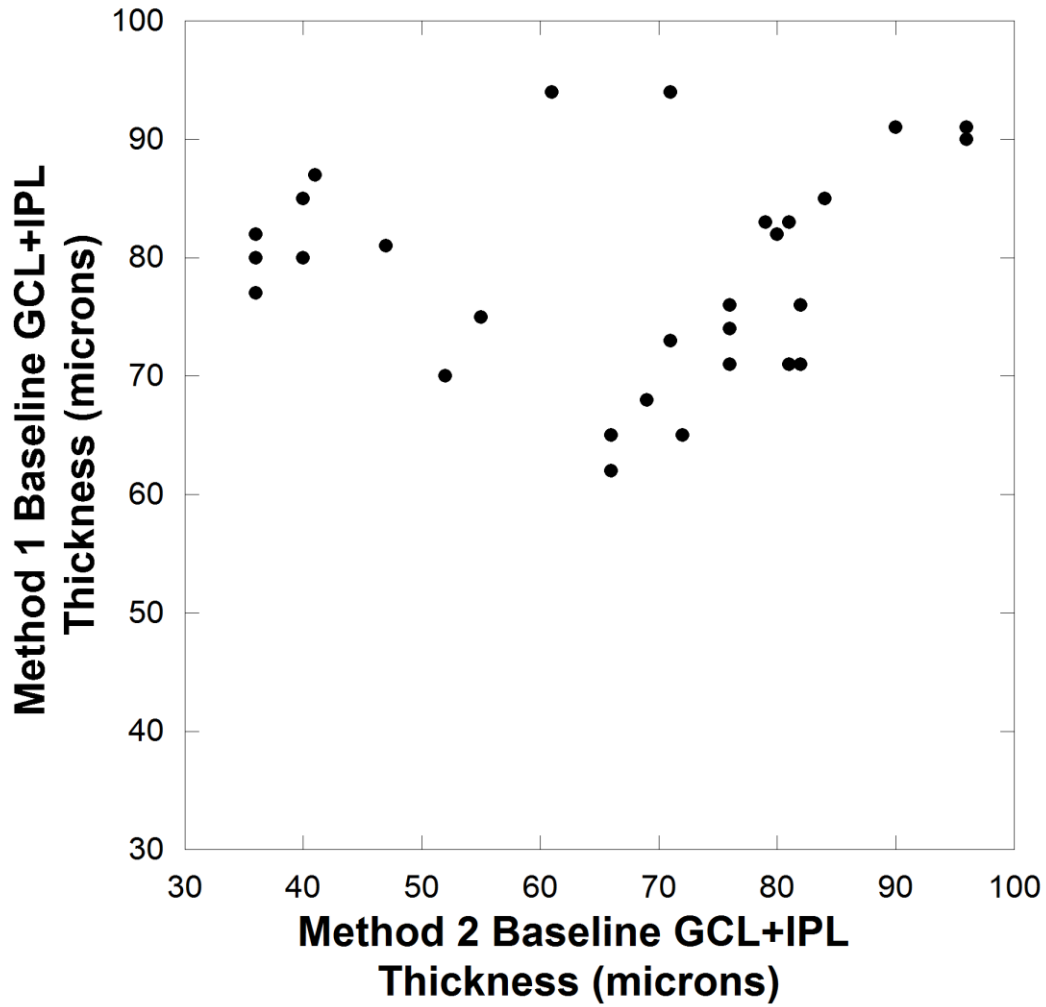

Figure legend for supplemental File for Early GCL+IPL loss in NAION:

Scatterplot comparing presentation GCL+IPL thickness values for study NAION eyes shows the apparent low values by method 2 compared with values by method 1.
